# Supplementary material for: Identification of Prescribing Patterns in Hemodialysis Outpatients Taking Multiple Medications
Source: MDPI journal article supplement (doi:10.3390/pharmacy11020043), 2023-02-23
Supplement: s1 [file s1]

**Supplementary table S1.**

**Univariate and multivariate logistic regression to assess the association between  
multidrug administration and specific comorbidities**

Number of patients receiving polypharmacy (≥9 drugs/day)

|                           | Univariate     |          |       | Multivariate   |          |       |
|---------------------------|----------------|----------|-------|----------------|----------|-------|
|                           | 95% Confidence |          |       | 95% Confidence |          |       |
|                           | OR             | Interval |       | OR             | Interval |       |
|                           |                | Lower    | Upper |                | Lower    | Upper |
| Diabetes mellitus         | 2.82           | 1.23     | 6.44  | 2.88           | 1.21     | 6.87  |
| Cardiovascular disease    | 2.01           | 0.87     | 4.68  | 2.09           | 0.86     | 5.06  |
| Cerebrovascular disease   | 1.40           | 0.46     | 4.27  | 1.87           | 0.54     | 6.41  |
| Peripheral artery disease | 2.61           | 0.65     | 10.48 | 2.11           | 0.48     | 9.15  |
| Liver disease             | 0.87           | 0.28     | 2.69  | 1.03           | 0.31     | 3.41  |
